# Supplementary material
Source: PubMed Central journal article supplement (PMC3587228)
Supplement: 1300881110_pnas.201300881SI.pdf [file 1300881110_pnas.201300881SI.pdf]

# Supporting Information

Li et al. 10.1073/pnas.1300881110

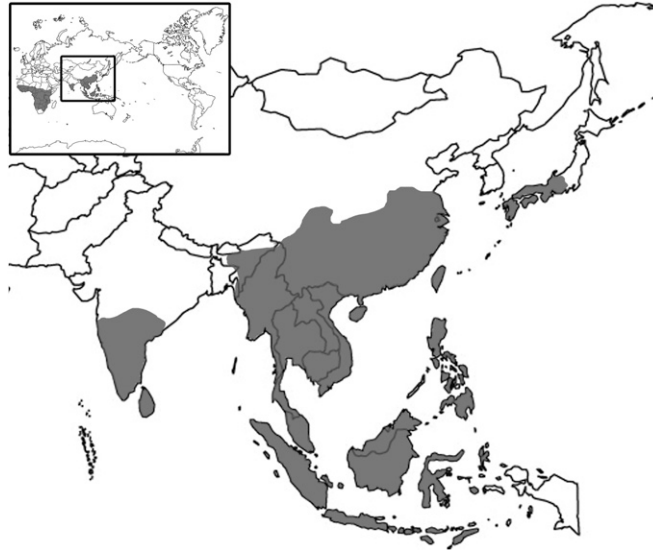

Fig. S1. Map with the current distribution of Rhacophoridae.





**Table S1. Samples, with sampling site, museum voucher nos., and GenBank accession nos. of corresponding sequences**

[Table S1](#)

**Table S2. Divergence times in million years before present and biogeographic reconstructions for nodes**

[Table S2](#)

**Table S3. Comparison of different temporal dispersal models using Lagrange, indicating that dispersal between the Indian subcontinent and Eurasia most likely occurred after 35 Ma, but before 25 Ma**

[Table S3](#)
